# Supplementary material for: Experiences of fatigued persons with multiple sclerosis with multimodal agility-based exercise training and the ReFEx study protocol: a qualitative extension of a feasibility study
Source: PubMed Central journal article supplement — BMJ Open. 2024 Feb 12;14(2):e076333. doi: 10.1136/bmjopen-2023-076333 (PMC10862272; doi:10.1136/bmjopen-2023-076333), 2024-02-12
Supplement: bmjopen-2023-076333supp001.pdf [file bmjopen-2023-076333supp001.pdf]

Experiences of fatigued persons with multiple sclerosis with multimodal agility-based exercise training and the ReFEx study protocol. A qualitative extension of a feasibility study.

**Authors:** Florian Wolf, Ann-Kristin Folkerts, Philipp Zimmer, Jörn Nielsen

### Supplement 1 - Interview guide and initial codes

| <b>Fatigue concept*</b><br><i>Fatigue Konzept</i>                                                                                         |                                                                                                                                                                                                                                                                                                                                                                                                                                                                                                                                                                                                                                  |                         |
|-------------------------------------------------------------------------------------------------------------------------------------------|----------------------------------------------------------------------------------------------------------------------------------------------------------------------------------------------------------------------------------------------------------------------------------------------------------------------------------------------------------------------------------------------------------------------------------------------------------------------------------------------------------------------------------------------------------------------------------------------------------------------------------|-------------------------|
| <b>No.</b>                                                                                                                                | <b>Questions</b>                                                                                                                                                                                                                                                                                                                                                                                                                                                                                                                                                                                                                 | <b>Initial Codes</b>    |
| 1.                                                                                                                                        | <p>What does fatigue mean to you?<br/><i>Was bedeutet Fatigue für Sie?#</i></p> <p>Add-on: How do you experience your fatigue in your everyday life?<br/><i>Zusatz: Wie erleben Sie die Fatigue in Ihrem Alltag?</i></p>                                                                                                                                                                                                                                                                                                                                                                                                         | Fatigue concept         |
| <b>Experiences &amp; demands (related to study therapies)</b><br><i>Erleben &amp; Beanspruchung (in den Therapieeinheiten der Studie)</i> |                                                                                                                                                                                                                                                                                                                                                                                                                                                                                                                                                                                                                                  |                         |
| 2.                                                                                                                                        | <p>Only MAT: How did you feel about training in a group?<br/><i>Nur MAT: Wie empfanden Sie das Training in der Gruppe?</i></p>                                                                                                                                                                                                                                                                                                                                                                                                                                                                                                   | Facilitators & barriers |
| 3.                                                                                                                                        | <p>How did you like the gym-based MAT/pool-based MAT/training on the cycle ergometer/strength training?<br/><i>Wie fanden Sie die Gangschule/Bewegungsbad/Ergometertraining/Trainingstherapie?</i></p> <p>Add-on: Was there something you particularly enjoyed?<br/><i>Zusatz: Gab es etwas, was Ihnen besonders gut gefallen hat?</i></p> <p>Add-on: Was there something that you particularly disliked?<br/><i>Zusatz: Gab es etwas, was Ihnen gar nicht gefallen hat?</i></p>                                                                                                                                                 | Facilitators & barriers |
| 4.                                                                                                                                        | <p>To what extent was participation in the respective therapies demanding or strenuous for you?<br/><i>Inwiefern haben Sie die Therapien angestrengt oder gefordert?</i></p>                                                                                                                                                                                                                                                                                                                                                                                                                                                     | Exertion                |
| 5.                                                                                                                                        | <p>If you had the opportunity to change something about the respective therapies, what would it be?<br/><i>Wenn Sie die Möglichkeit hätten, an den beiden Therapien etwas zu ändern, was wäre das?</i></p> <p>Add-on: Why do you wish to change this?<br/><i>Zusatz: Was sind die Gründe für Ihre Veränderungswünsche?</i></p>                                                                                                                                                                                                                                                                                                   | Facilitators & barriers |
| 6.                                                                                                                                        | <p>How did the therapies influence your fatigue? Could you please describe in detail, how you felt during and after the therapies?<br/><i>Welche Wirkung hatte die Therapie auf Ihren Erschöpfungs-/Müdigkeitszustand? Können Sie bitte genau beschreiben, wie es Ihnen während und nach der Therapie ergangen ist?</i></p> <p>Add-on: How long did it take for you to recover after the therapies?<br/><i>Zusatz: Wie lange haben Sie nach der Therapie gebraucht, um sich zu erholen?</i></p> <p>Add-on: How or where did your fatigue manifest itself?<br/><i>Zusatz: Wie oder wo hat sich Ihre Erschöpfung geäußert?</i></p> | Fatigue                 |
| 7.                                                                                                                                        | <p>Did you experience any discomfort during training? If yes, what kind of discomfort and where?</p>                                                                                                                                                                                                                                                                                                                                                                                                                                                                                                                             | Facilitators & barriers |

|                                                                                                             |                                                                                                                                                                                                                                                                                                               |                              |
|-------------------------------------------------------------------------------------------------------------|---------------------------------------------------------------------------------------------------------------------------------------------------------------------------------------------------------------------------------------------------------------------------------------------------------------|------------------------------|
|                                                                                                             | <i>Tauchten während des Trainings generell Beschwerden auf? Wenn ja, welche und wann?</i>                                                                                                                                                                                                                     |                              |
| 8.                                                                                                          | To what extent were you able to recover in between the therapy sessions?<br><i>Inwiefern konnten Sie sich zwischen den einzelnen Therapien erholen?</i>                                                                                                                                                       | Fatigue                      |
| <b>Personal relevance &amp; goal achievement</b><br><b><i>Persönliche Relevanz &amp; Zielerreichung</i></b> |                                                                                                                                                                                                                                                                                                               |                              |
| 9.                                                                                                          | Do you feel like you were able to improve your balance?<br><i>Haben Sie das Gefühl, dass Sie Ihr Gleichgewicht verbessern konnten?</i>                                                                                                                                                                        | Benefits                     |
| 10.                                                                                                         | Did you experience improvements in other areas? If yes, what do you think is the reason for this?<br><i>Haben Sie Verbesserungen in anderen Bereichen bemerkt? Falls ja, worauf führen Sie dies zurück?</i>                                                                                                   | Benefits                     |
| 11.                                                                                                         | Are there any symptoms, that got worse, because of the therapies? If yes, what do you think is the reason for this?<br><i>Gab es Symptome, die sich durch die Therapien verschlechtert haben? Falls ja, worauf führen Sie dies zurück?</i>                                                                    | Facilitators & barriers      |
| 12.                                                                                                         | You were allocated to therapy program MAT/SET. There was also the program MAT/SET. How satisfied have you been with your allocation?<br><i>Sie wurden im Rahmen der Studie einem Therapieprogramm MAT/SET zugeteilt, es gab noch das Therapieprogramm MAT/SET. Wie zufrieden waren Sie mit der Zuteilung?</i> | Satisfaction with allocation |
| 13.                                                                                                         | How well did participating in the study fit into your overall rehabilitation schedule?<br><i>Wie fügte sich die Studienteilnahme zeitlich-organisatorisch insgesamt in Ihren Behandlungsplan ein?</i>                                                                                                         | Organizational conditions    |
| 14.                                                                                                         | How relevant was participating in the study for your personal rehab goals?<br><i>Welche Relevanz hatte die Teilnahme an dem Studienprojekt für Ihre persönlichen Rehazielle?</i>                                                                                                                              | Relevance for rehab-goals    |

MAT=multimodal agility-based exercise training; SET=strength and endurance training

\*Block 1 (fatigue concept) was excluded from this analysis but will be analyzed and published elsewhere.

#The original German language questions are presented alongside the translations provided by the authors.
