# Supplementary material for: Experiences of fatigued persons with multiple sclerosis with multimodal agility-based exercise training and the ReFEx study protocol: a qualitative extension of a feasibility study
Source: PubMed Central journal article supplement — BMJ Open. 2024 Feb 12;14(2):e076333. doi: 10.1136/bmjopen-2023-076333 (PMC10862272; doi:10.1136/bmjopen-2023-076333), 2024-02-12
Supplement: bmjopen-2023-076333supp002.pdf [file bmjopen-2023-076333supp002.pdf]

## Supplement 2 – COREQ 32 checklist

| No                                             | Item                                     | Guide questions/description                                                                                                                        | Response                                                                                                                                                                                                                                                                                                                      |
|------------------------------------------------|------------------------------------------|----------------------------------------------------------------------------------------------------------------------------------------------------|-------------------------------------------------------------------------------------------------------------------------------------------------------------------------------------------------------------------------------------------------------------------------------------------------------------------------------|
| <b>Domain 1: Research team and reflexivity</b> |                                          |                                                                                                                                                    |                                                                                                                                                                                                                                                                                                                               |
| Personal Characteristics                       |                                          |                                                                                                                                                    |                                                                                                                                                                                                                                                                                                                               |
| 1.                                             | Interviewer/facilitator                  | Which author/s conducted the interview or focus group?                                                                                             | JN (p.10)                                                                                                                                                                                                                                                                                                                     |
| 2.                                             | Credentials                              | What were the researcher's credentials                                                                                                             | PhD                                                                                                                                                                                                                                                                                                                           |
| 3.                                             | Occupation                               | What was their occupation at the time of the study?                                                                                                | Clinical neuropsychologist at the NRC, researcher and lecturer at the University Hospital Cologne                                                                                                                                                                                                                             |
| 4.                                             | Gender                                   | Was the researcher male or female                                                                                                                  | Male                                                                                                                                                                                                                                                                                                                          |
| 5.                                             | Experience and training                  | What experience or training did the researcher have?                                                                                               | Systemic therapist and counselor with many years of experience in clinical patient-centered communication. (p.11)                                                                                                                                                                                                             |
| Relationship with participants                 |                                          |                                                                                                                                                    |                                                                                                                                                                                                                                                                                                                               |
| 6.                                             | Relationship established                 | Was a relationship established prior to study commencement?                                                                                        | Most, but not all the participants met the interviewer in his role as a neuropsychologist prior to the interviews. (p.11)                                                                                                                                                                                                     |
| 7.                                             | Participant knowledge of the interviewer | What did the participants know about the researcher? <i>e.g., personal goals reasons for doing the research</i>                                    | As part of the research team, the interviewer explained the ideas, design, and goals of the study to potential participants. Participants knew about the interviewer's clinical role. (p.11)                                                                                                                                  |
| 8.                                             | Interviewer characteristics              | What characteristics were reported about the interviewer/facilitator? <i>e.g., bias, assumptions, reasons, and interests in the research topic</i> | Participants were informed that multiple sclerosis and the topic of the study was one of the researchers' preferred research areas. They were informed that the study was designed by the research team to gain a better understanding of fatigue and to find possible therapeutic ways to improve fatigue in the NRC. (p.11) |
| <b>Domain 2: study design</b>                  |                                          |                                                                                                                                                    |                                                                                                                                                                                                                                                                                                                               |
| Theoretical framework                          |                                          |                                                                                                                                                    |                                                                                                                                                                                                                                                                                                                               |

|                       |                                       |                                                                                                                                                                                                          |                                                                                                                                                                             |
|-----------------------|---------------------------------------|----------------------------------------------------------------------------------------------------------------------------------------------------------------------------------------------------------|-----------------------------------------------------------------------------------------------------------------------------------------------------------------------------|
| 9.                    | Methodological orientation and Theory | What methodological orientation was stated to underpin the study? <i>e.g.</i> , <i>grounded theory</i> , <i>discourse analysis</i> , <i>ethnography</i> , <i>phenomenology</i> , <i>content analysis</i> | Coding of the interviews was based on the approach of focused analysis for qualitative interviews, as described by Rädiker & Kuckartz (2020). (p.10)                        |
| Participant selection |                                       |                                                                                                                                                                                                          |                                                                                                                                                                             |
| 10.                   | Sampling                              | How were participants selected? <i>e.g.</i> , <i>face-to-face</i> , <i>telephone</i> , <i>mail</i> , <i>email</i>                                                                                        | Face-to-face (p.8)                                                                                                                                                          |
| 11.                   | Method of approach                    | How were participants approached? <i>e.g.</i> , <i>face-to-face</i> , <i>telephone</i> , <i>mail</i> , <i>email</i>                                                                                      | Face-to-face (p.8)                                                                                                                                                          |
| 12.                   | Sample size                           | How many participants were in the study?                                                                                                                                                                 | 12 (p.8)                                                                                                                                                                    |
| 13.                   | Non-participation                     | How many people refused to participate or dropped out? Reasons?                                                                                                                                          | Zero (p.8)                                                                                                                                                                  |
| Setting               |                                       |                                                                                                                                                                                                          |                                                                                                                                                                             |
| 14.                   | Setting of data collection            | Where was the data collected? <i>e.g.</i> , <i>home</i> , <i>clinic</i> , <i>workplace</i>                                                                                                               | Office in a rehab clinic. (p.10)                                                                                                                                            |
| 15.                   | Presence of non-participants          | Was anyone else present besides the participants and researchers?                                                                                                                                        | No                                                                                                                                                                          |
| 16.                   | Description of sample                 | What are the important characteristics of the sample? <i>e.g.</i> <i>demographic data</i> , <i>date</i>                                                                                                  | Important characteristics are sex, age, working capacity, functional disability, multiple sclerosis type, time since diagnosis, and fatigue, as reported in Table 2. (p.12) |
| Data collection       |                                       |                                                                                                                                                                                                          |                                                                                                                                                                             |
| 17.                   | Interview guide                       | Were questions, prompts, guides provided by the                                                                                                                                                          | A guide was provided by the authors. It was pilot tested with                                                                                                               |

|                                        |                                |                                                                          |                                                                                                                                                     |
|----------------------------------------|--------------------------------|--------------------------------------------------------------------------|-----------------------------------------------------------------------------------------------------------------------------------------------------|
|                                        |                                | authors? Was it pilot tested?                                            | two persons with multiple sclerosis prior to the start of the study. (p.9)                                                                          |
| 18.                                    | Repeat interviews              | Were repeat interviews carried out? If yes, how many?                    | No repeat interviews were carried out.                                                                                                              |
| 19.                                    | Audio/visual recording         | Did the research use audio or visual recording to collect the data?      | We used audio recordings. (p.10)                                                                                                                    |
| 20.                                    | Duration                       | What was the duration of the interviews or focus group?                  | Interviews had a median length of 11:55min, median length per group was 15:42min for MAT and 09:31min for SET. (p.12)                               |
| 22.                                    | Data saturation                | Was data saturation discussed?                                           | Data saturation was discussed briefly in the limitations section. (p.26)                                                                            |
| 23.                                    | Transcripts returned           | Were transcripts returned to participants for comment and/or correction  | No (p.26)                                                                                                                                           |
| <b>Domain 3: analysis and findings</b> |                                |                                                                          |                                                                                                                                                     |
| Data analysis                          |                                |                                                                          |                                                                                                                                                     |
| 24.                                    | Number of data coders          | How many data coders coded the data?                                     | FW coded all interviews, while one Interview was coded together by FW and JN. (p.10)                                                                |
| 25.                                    | Description of the coding tree | Did authors provide a description of the coding tree?                    | The coding tree is provided in table 1. (p.13)                                                                                                      |
| 26.                                    | Derivation of themes           | Were themes identified in advance or derived from the data?              | Initial codes were derived in advance from the interview guide. These were then adapted and expanded by data derived from the interviews. (p.10-11) |
| 27.                                    | Software                       | What software, if applicable, was used to manage the data?               | MAXQDA2022 (p.10)                                                                                                                                   |
| 28.                                    | Participant checking           | Did participants provide feedback on the findings?                       | No (p.26)                                                                                                                                           |
| Reporting                              |                                |                                                                          |                                                                                                                                                     |
| 29.                                    | Quotations presented           | Were participant quotations presented to illustrate the themes/findings? | Yes (Results section)                                                                                                                               |

|     |                              |                                                                        |     |
|-----|------------------------------|------------------------------------------------------------------------|-----|
|     |                              | Was each quotation identified? <i>e.g.</i> , <i>participant number</i> |     |
| 30. | Data and findings consistent | Was there consistency between the data presented and the findings?     | Yes |
| 31. | Clarity of major themes      | Were major themes clearly presented in the findings?                   | Yes |
| 32. | Clarity of minor themes      | Is there a description of diverse cases or discussion of minor themes? | Yes |
